# Supplementary material
Source: PubMed Central journal article supplement (PMC298791)
Supplement: pnas_0237106100_7.pdf [file pnas_0237106100_7.pdf]

**Table 3. Female serum hormone and metabolite levels in the fasted, fed, or ambient states**

|                              | <i>Gcgr</i> <sup>+/+</sup> |             | <i>Gcgr</i> <sup>-/-</sup> |                |
|------------------------------|----------------------------|-------------|----------------------------|----------------|
|                              | Fasted                     | Fed         | Fasted                     | Fed            |
| Glucose, mM                  | 6.5 ± 0.3                  | 6.6 ± 0.4   | 4.8 ± 0.4**                | 5.4 ± 0.1**    |
| Insulin, ng/ml               | 0.68 ± 0.11                | 1.22 ± 0.26 | 0.76 ± 0.09                | 0.84 ± 0.13    |
| Glucagon, pg/ml <sup>†</sup> | 99 ± 15                    | 148 ± 28    | 21886 ± 2720***            | 8404 ± 1285*** |
| Leptin, ng/ml <sup>†</sup>   | 8.6 ± 1.0                  | ND          | 5.1 ± 0.4*                 | ND             |
| TG, mM <sup>†</sup>          | 0.77 ± 0.11                | 0.96 ± 0.21 | 0.85 ± 0.11                | 0.37 ± 0.05*   |
| LDL, mM <sup>†</sup>         | 0.12 ± 0.01                | 0.15 ± 0.01 | 0.28 ± 0.01***             | 0.25 ± 0.03**  |

TG, triglycerides; LDL, low-density lipoprotein. Data are the mean ± SEM, *n* = 5–7. \*, *P* < 0.05; \*\*, *P* < 0.01; \*\*\*, *P* < 0.001.

<sup>†</sup>Ambient plasma levels were determined.
