# Supplementary material
Source: PubMed Central journal article supplement (PMC298791)

A

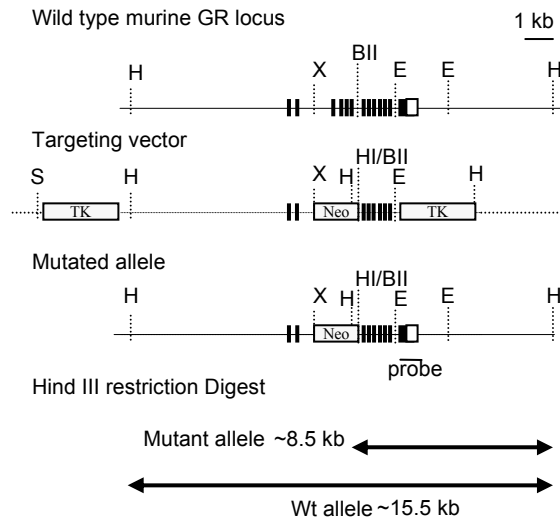

B

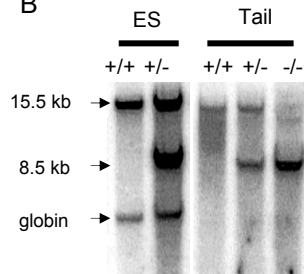

Supplement: pnas_0237106100_2.pdf [file pnas_0237106100_2.pdf]

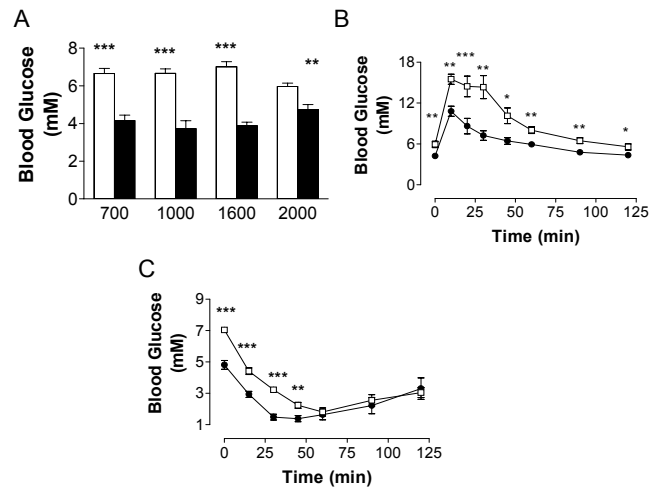

Supplement: pnas_0237106100_4.pdf [file pnas_0237106100_4.pdf]

A

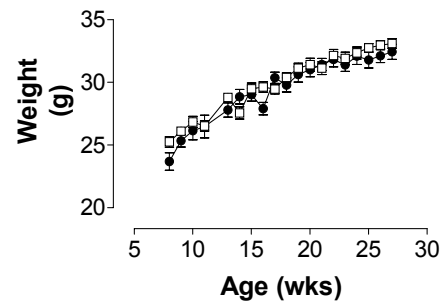

B

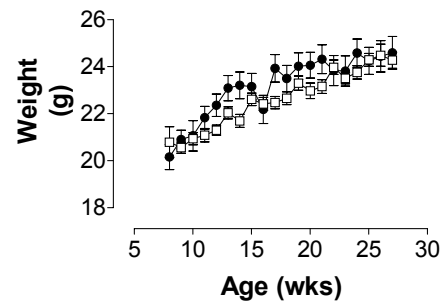

Supplement: pnas_0237106100_6.pdf [file pnas_0237106100_6.pdf]

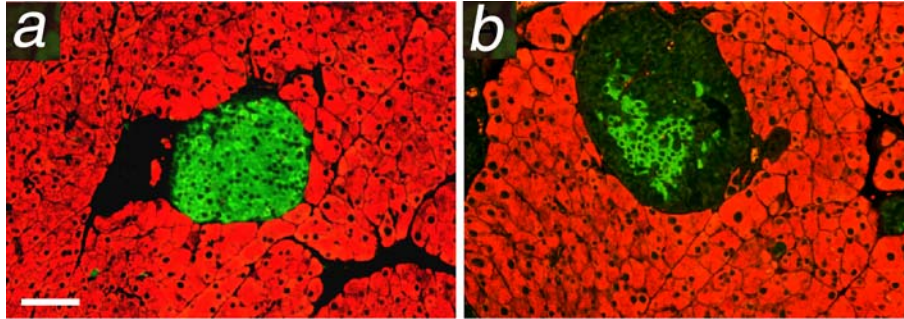

Supplement: pnas_0237106100_9.pdf [file pnas_0237106100_9.pdf]
